# Supplementary material for: Label-free colorimetric detection of trace cholesterol based on molecularly imprinted photonic hydrogels
Source: Royal Society of Chemistry journal article supplement (doi:10.1039/c1jm14230e), 2011-01-01
Supplement: c1jm14230e.pdf [file c1jm14230e.pdf]

*Supporting Information for*

**Label-free colorimetric detection of trace cholesterol based on molecularly imprinted photonic hydrogels**

**Jinhua Li,<sup>‡a</sup> Zhong Zhang,<sup>‡ab</sup> Shoufang Xu,<sup>ac</sup> Lingxin Chen,<sup>\*a</sup> Na Zhou,<sup>a</sup> Hua Xiong,<sup>\*b</sup> and Hailong Peng<sup>b</sup>**

*<sup>a</sup>Key Laboratory of Coastal Zone Environmental Processes, CAS; Shandong Provincial Key Laboratory of Coastal Zone Environmental Processes; Yantai Institute of Coastal Zone Research, Chinese Academy of Sciences, Yantai 264003, China*

*<sup>b</sup>State Key Laboratory of Food Science and Technology, Nanchang University, Nanchang 330047, China*

*<sup>c</sup>Graduate University of Chinese Academy of Sciences, Beijing 100049, China*

---

\*Corresponding author. Tel./Fax: +86 535 2109130, E-mail address: lxchen@yic.ac.cn (L. Chen).

\*Co-corresponding author. Tel./Fax: +86 791 6634810, E-mail address: huaxiong100@yahoo.com.cn (H. Xiong).

<sup>‡</sup>Equally contributed to this work.

## 1. Preparation of silica colloidal crystal templates

Silica colloidal crystal templates were prepared according to the Stöber method<sup>1</sup>. Briefly, 4.5 mL TEOS and 90 mL anhydrous ethanol were mixed in a 250 mL three-neck flask, under intensive stirring with a magnetic beater, and then 5 mL ammonia and 15 mL deionized water were slowly added together and kept reaction for 12 h, producing seed solution. The seed solution of 25 mL were mixed with 70 mL anhydrous ethanol, 5 mL ammonia and 15 mL deionized water in a 250 ml three-neck flask, and then the TEOS solution was slowly added with a constant pressure funnel, and then the monodisperse silica particles were obtained by centrifugation and rinsing using anhydrous ethanol for 3 times to wash off residues. Afterwards, the obtained monodisperse silica particles were fully dispersed in anhydrous ethanol by ultrasonic bath with a weight concentration of about 1%, then loaded into 10 mL vials. A clean glass slide was put into each vial vertically for silica colloidal crystal growth. After evaporation of ethanol, silica colloidal crystal templates were formed on both sides of each glass slide.

## 2. Supplementary Data

**Table S1.** Property comparisons of MIPH film using different porogens.

| Porogen      | Solubility        | Integrity        | Corrosivity     |
|--------------|-------------------|------------------|-----------------|
| Chloroform   | +++ <sup>a)</sup> | ++ <sup>b)</sup> | + <sup>c)</sup> |
| Acetonitrile | +                 | ++               | +               |
| Toluene      | +++               | +                | +++             |

a) Strong.

b) Common.

c) Weak.

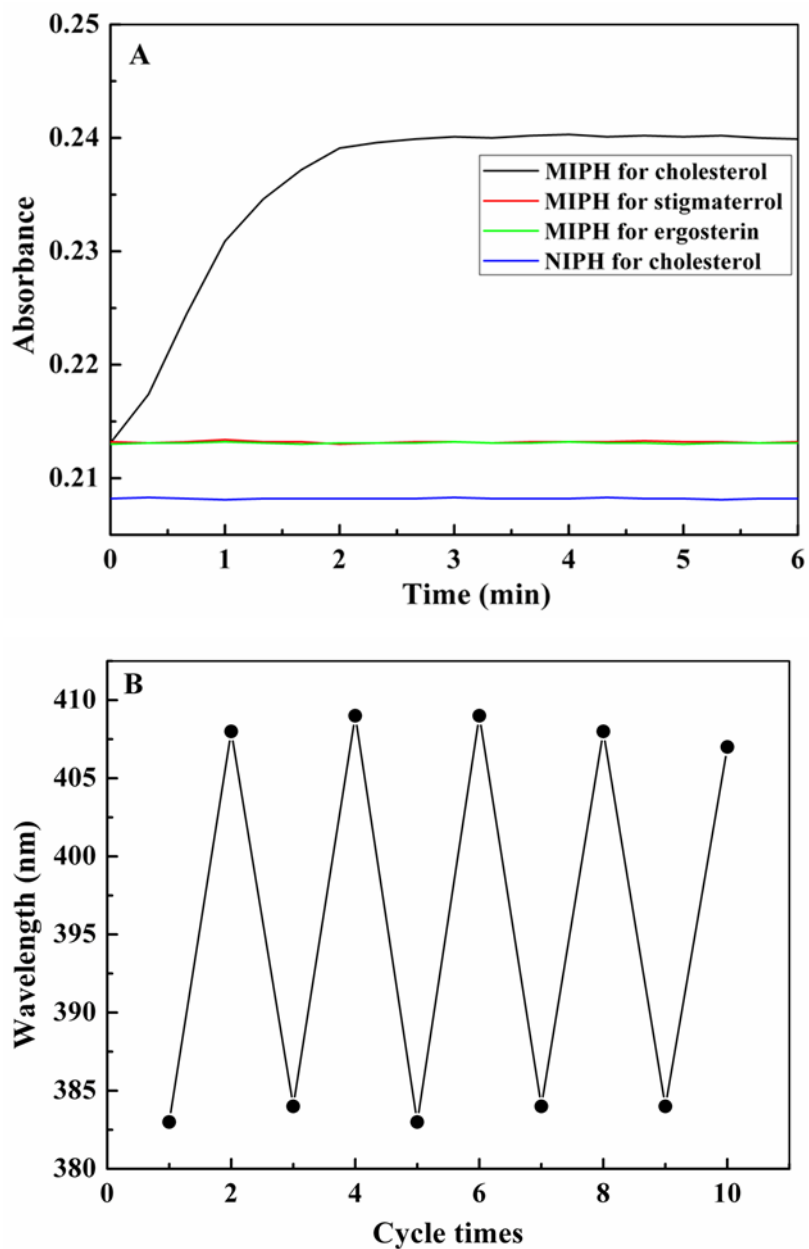

**Fig. S1.** (A) Binding kinetics of MIPH for cholesterol, stigmasterol and ergosterol, and of NIPH for cholesterol. (B) Recoverability of MIPH dipped in a PBS containing cholesterol and recovered in a PBS with cholesterol after elution.

## References

1 W. Stöber, A. Fink and E. Bohn, *J. Colloid Interface Sci.*, 1968, **26**, 62–69.
